# Supplementary material for: Renal denervation reduces atrial remodeling in hypertensive rats with metabolic syndrome
Source: Springer Nature journal article supplement (doi:10.1007/s00395-022-00943-6), 2022-07-14

Supplementary  
Figure 1

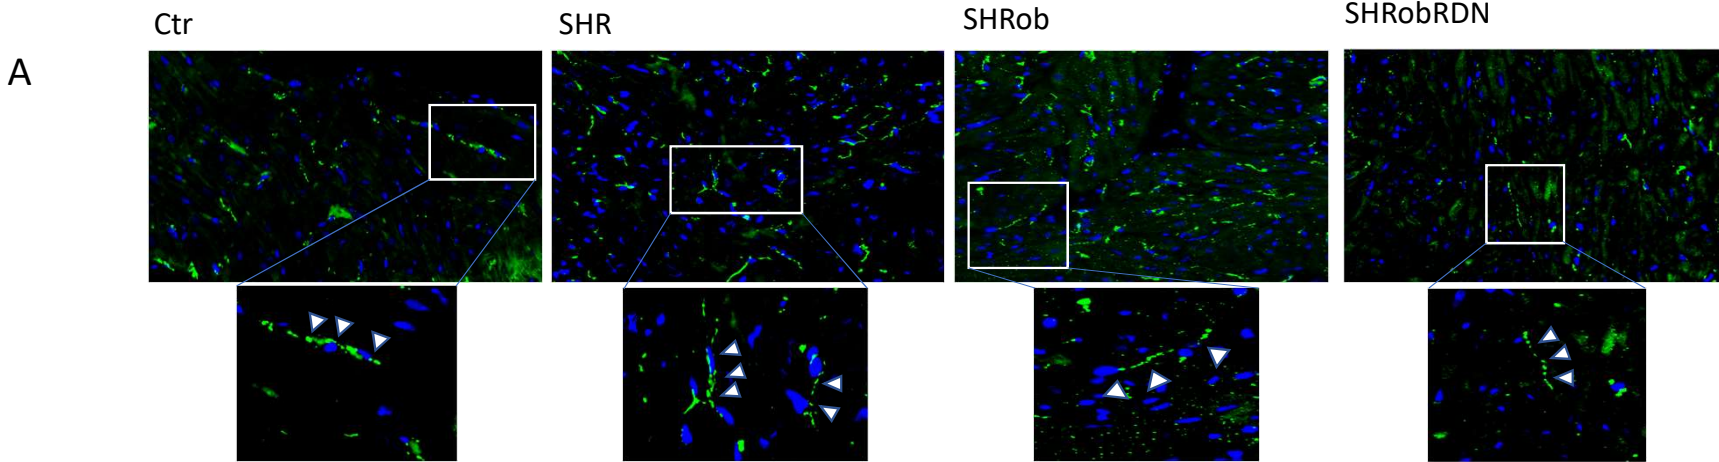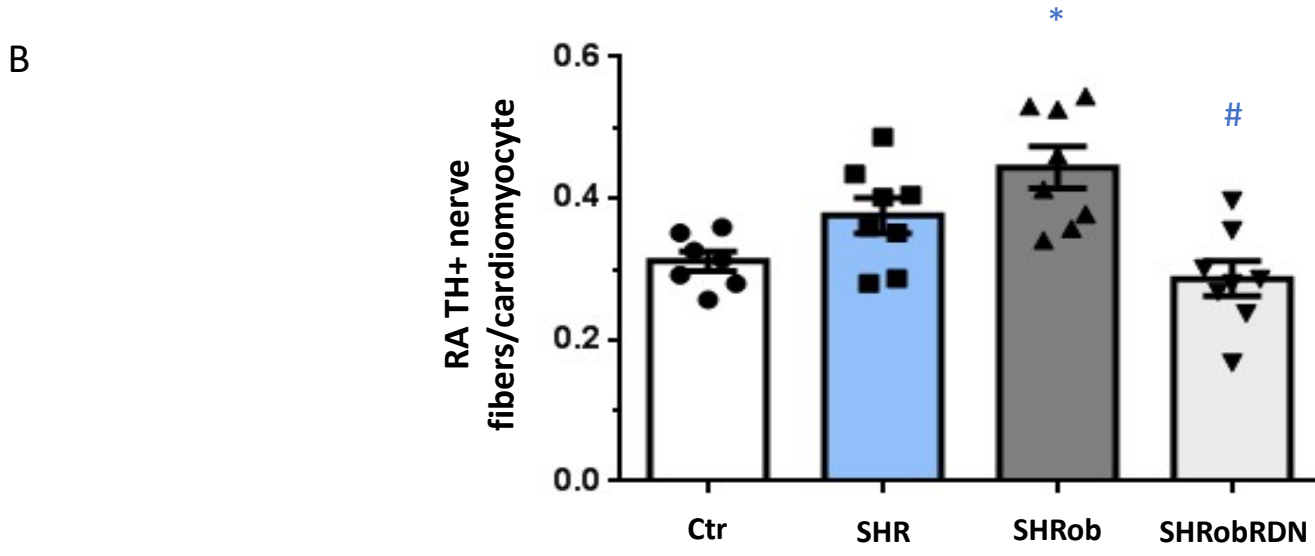

Supplementary  
Figure 2

A Right atrial myocyte hypertrophy

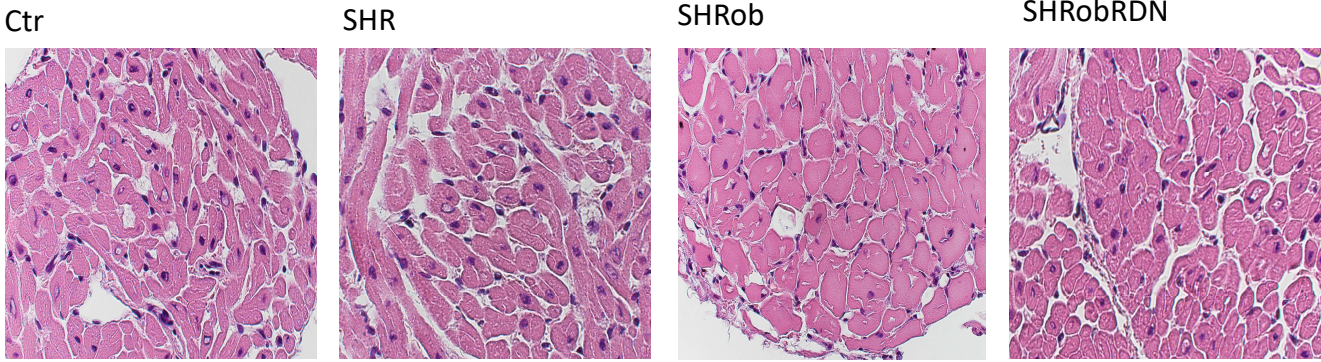

B

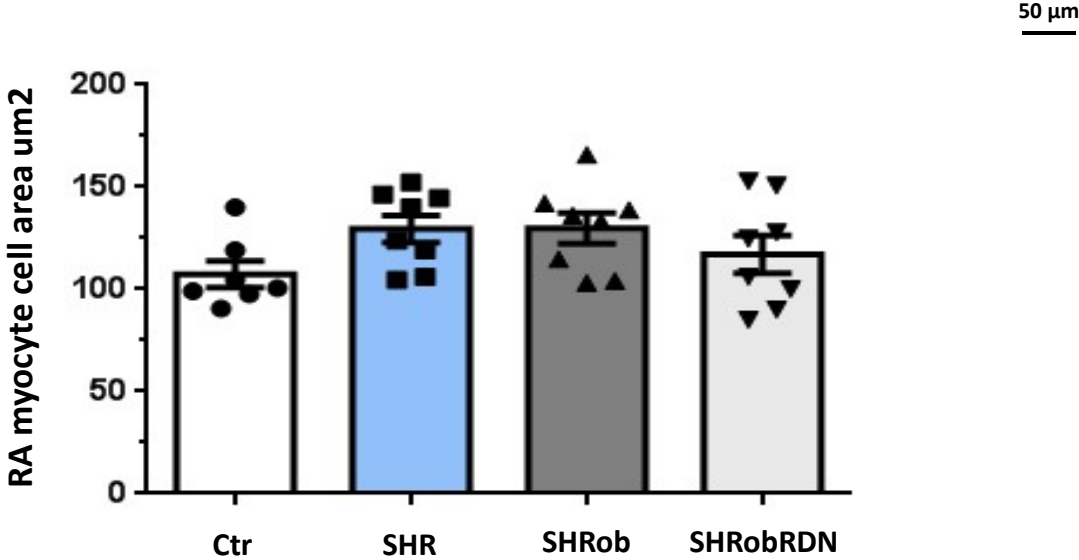

Supplementary  
Figure 2

C

Right atrial interstitial fibrosis

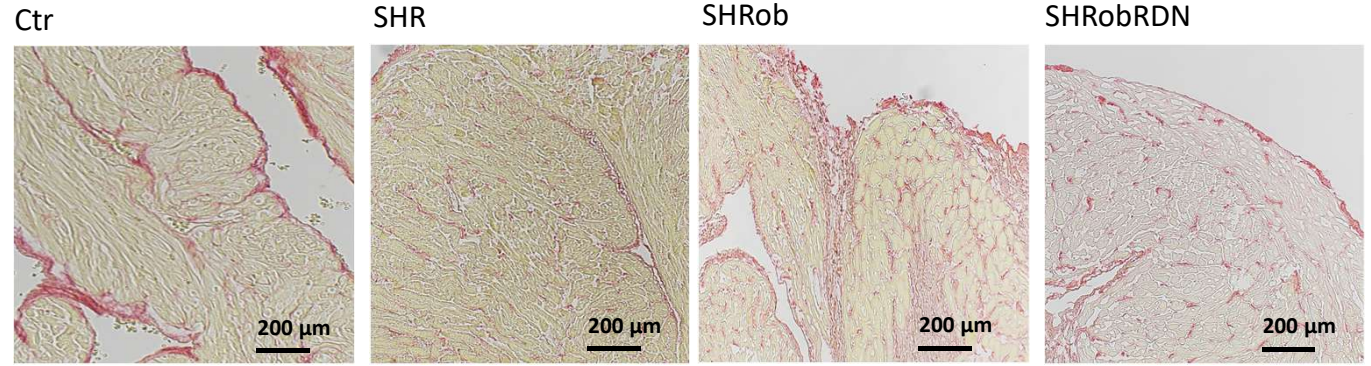

D

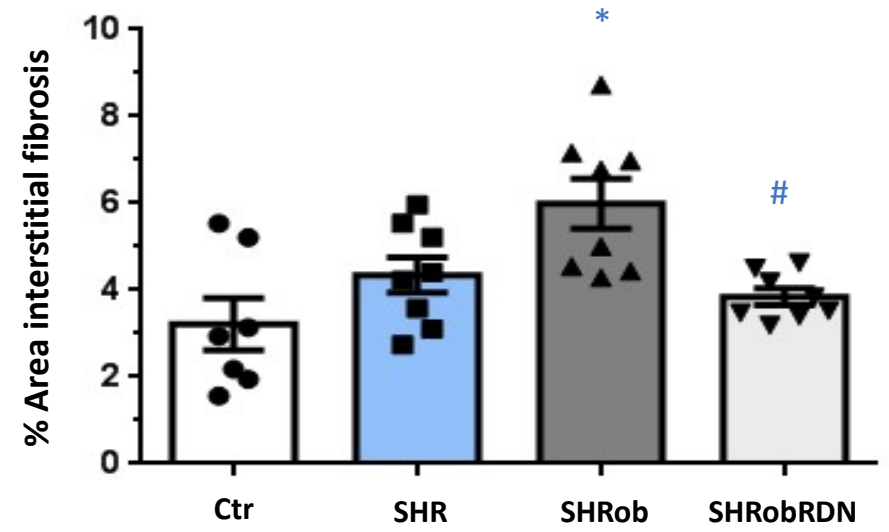

Supplementary  
Figure 2

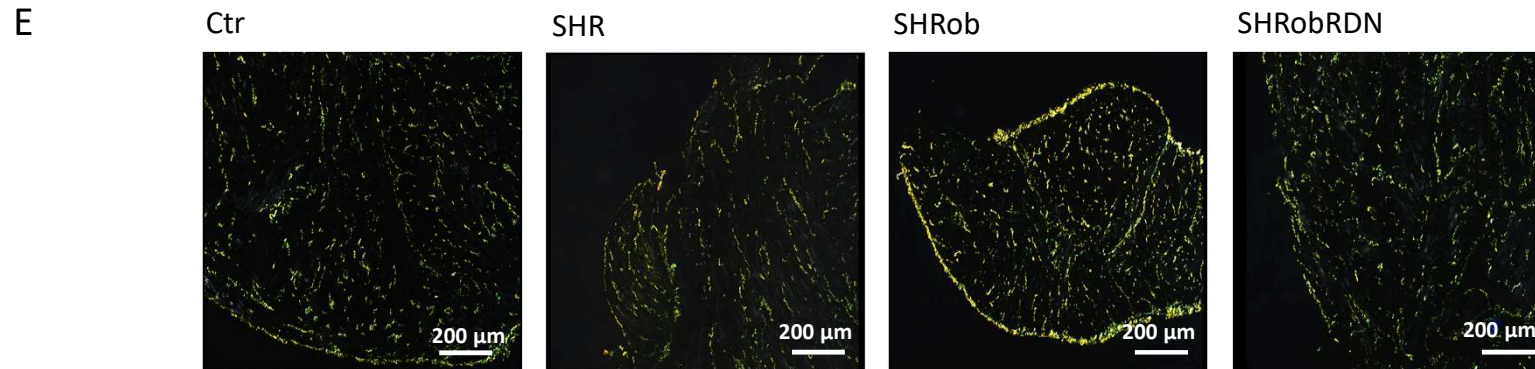

F

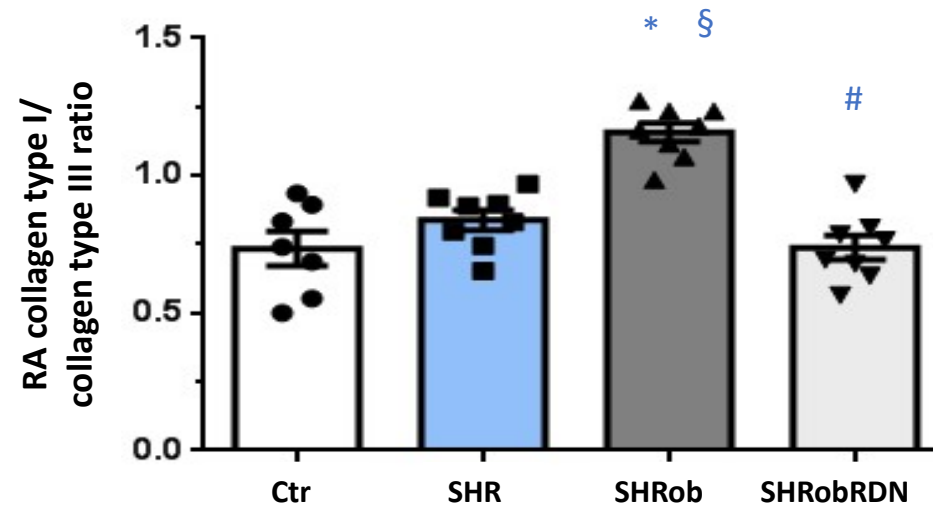

Supplementary  
Figure 2

G

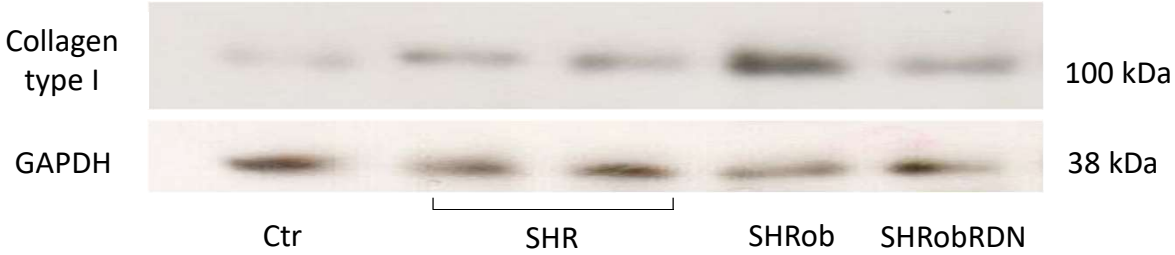

H

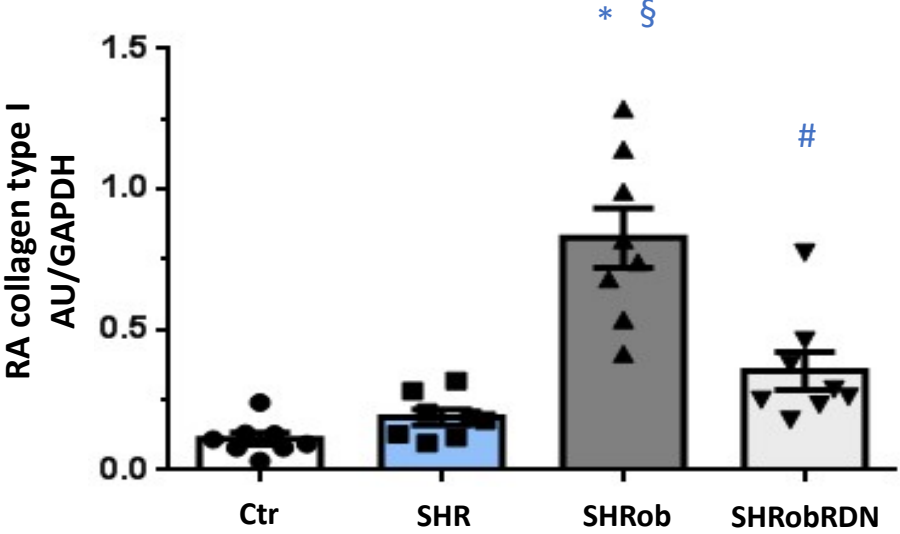

# Supplementary Figure 3

A

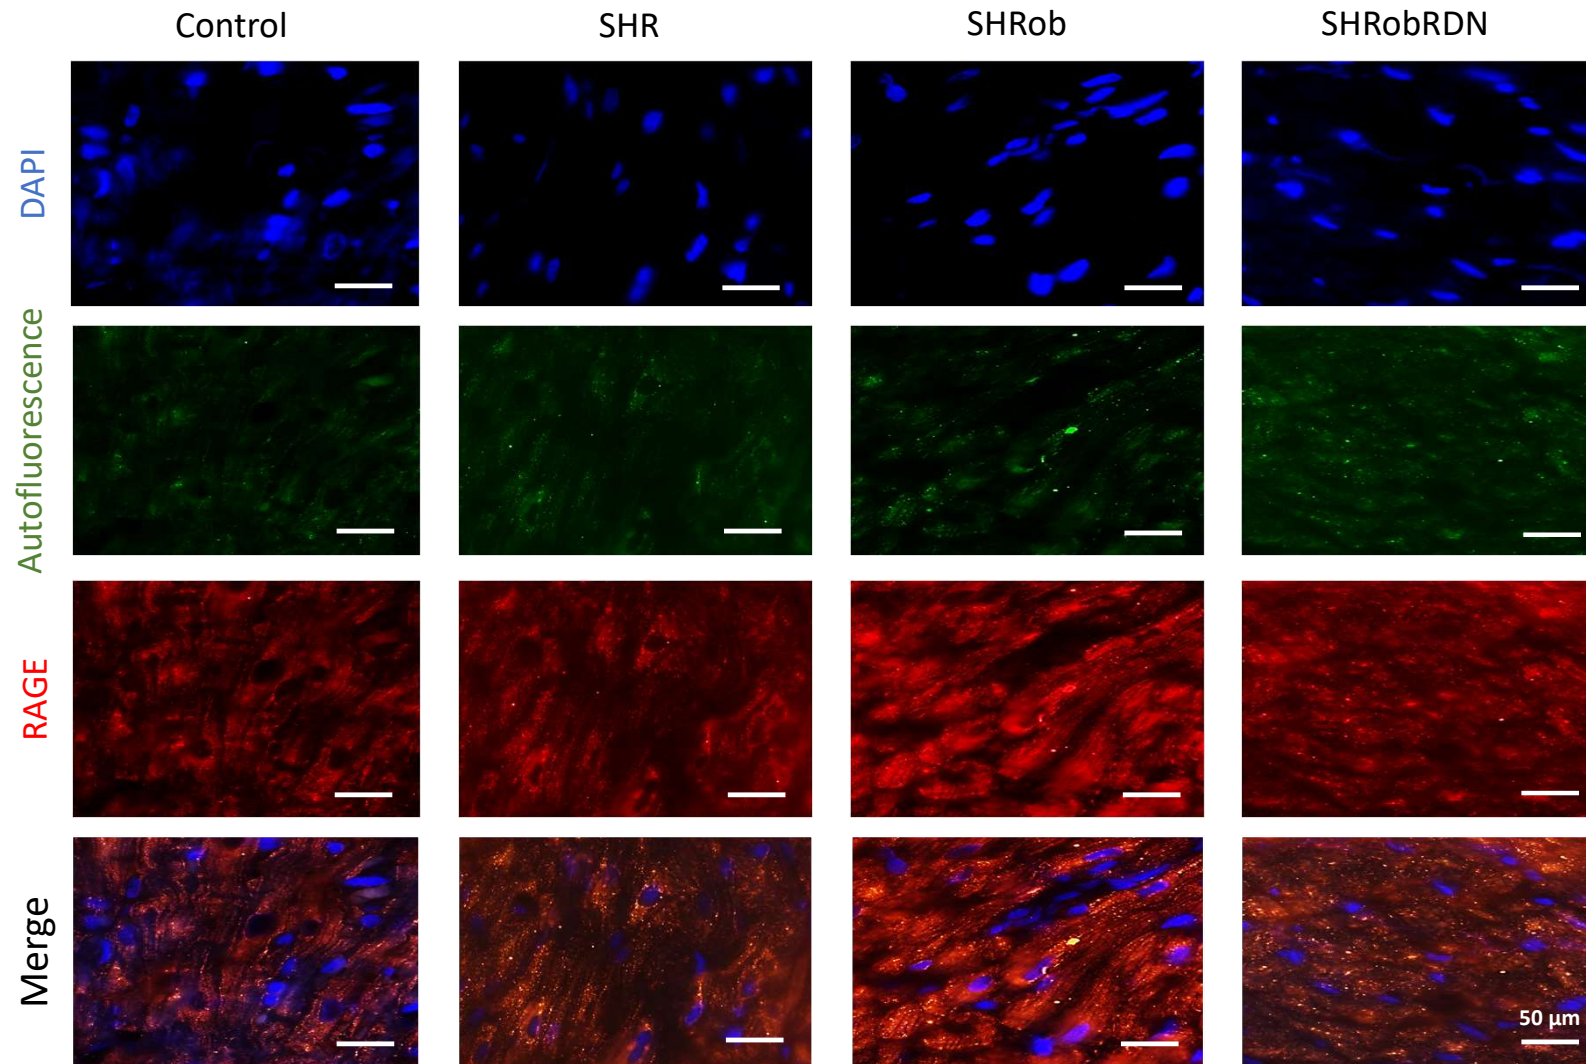

Supplementary Figure 3

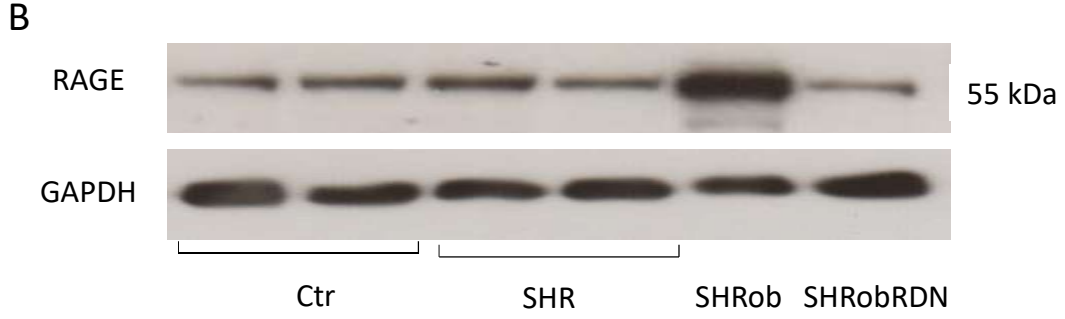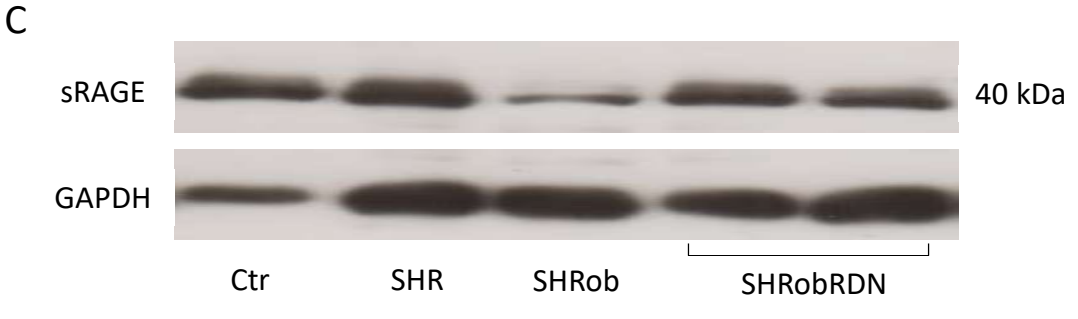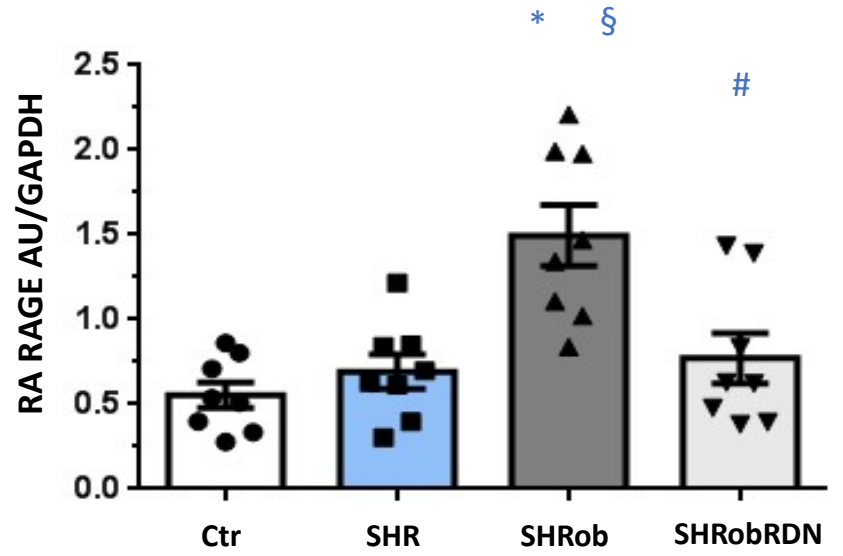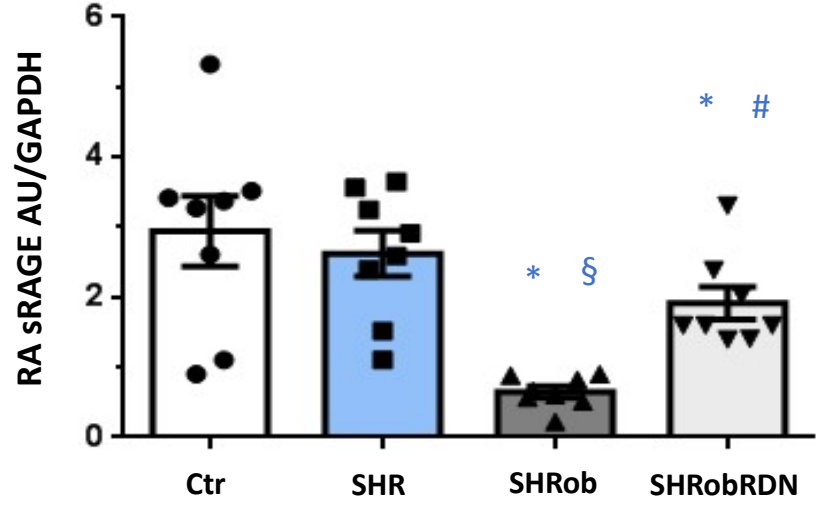

Supplementary  
Figure 4

A Right atrial CML

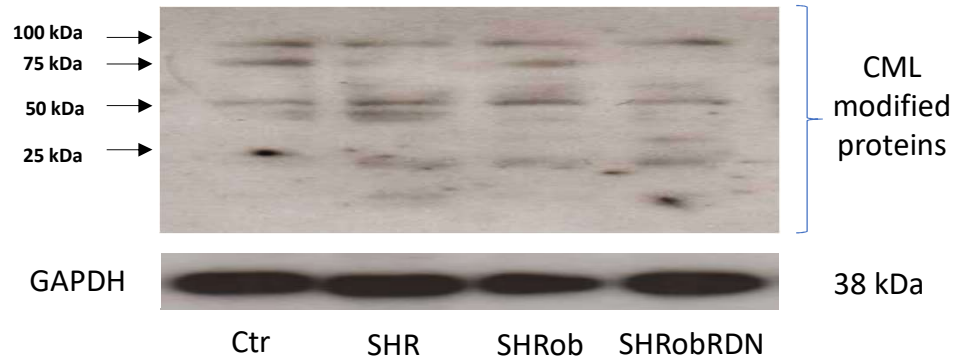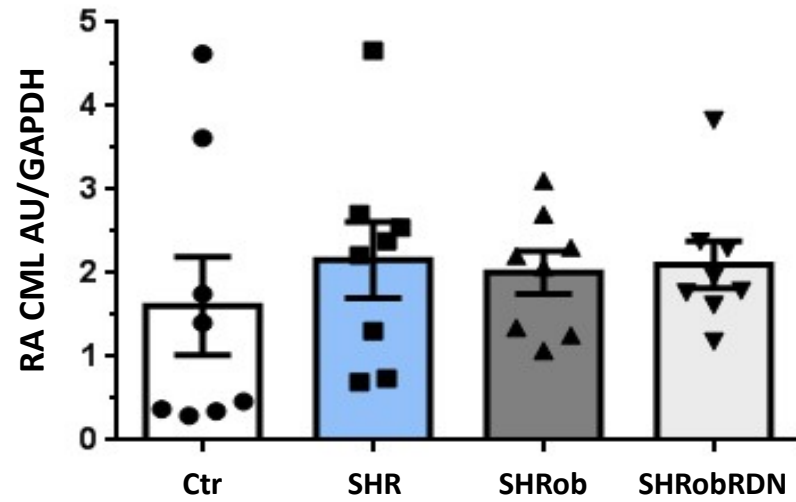

B Right atrial HMGB1

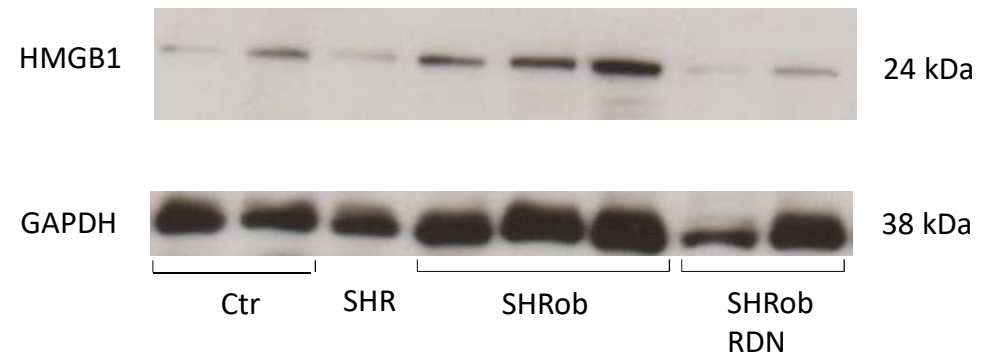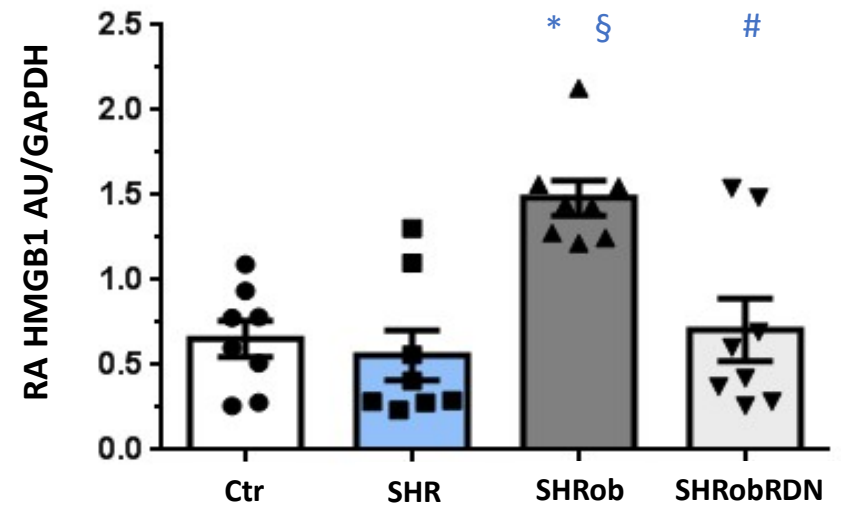



Supplementary  
Figure 4

C Right atrial expression of NFkB

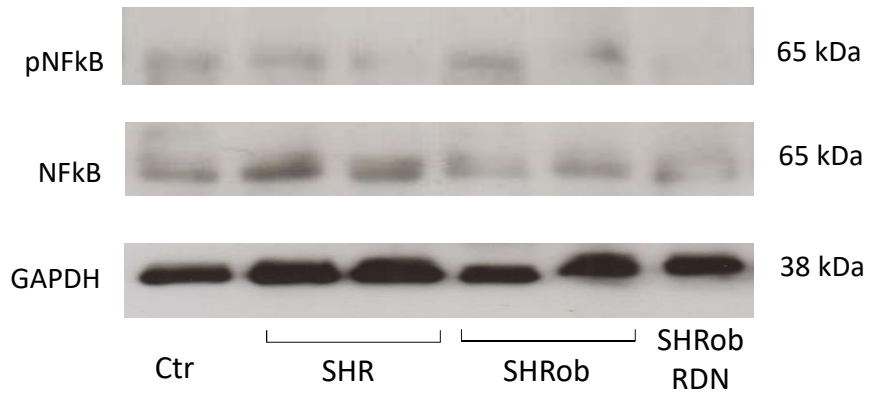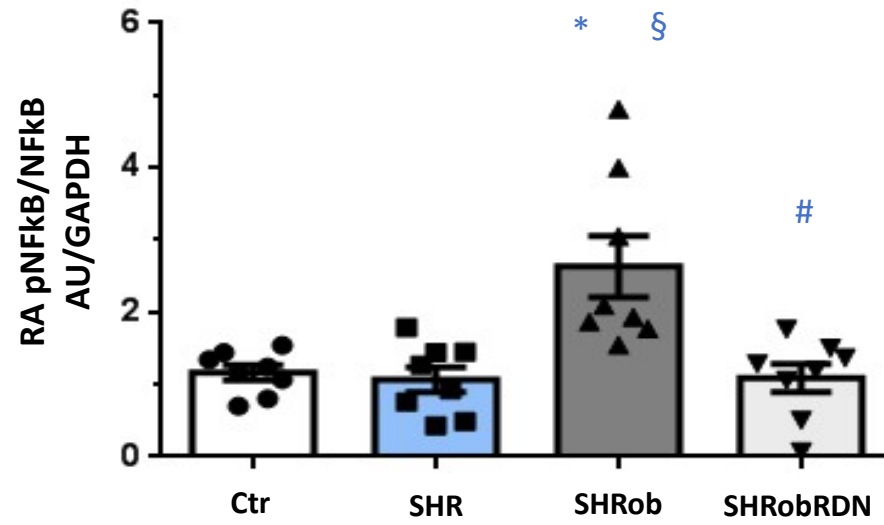

Supplementary  
Figure 4

D Right atrial expression of IL-6

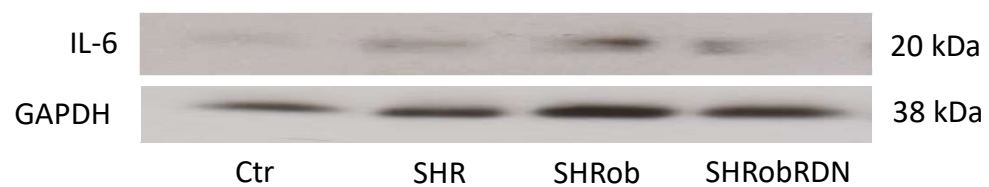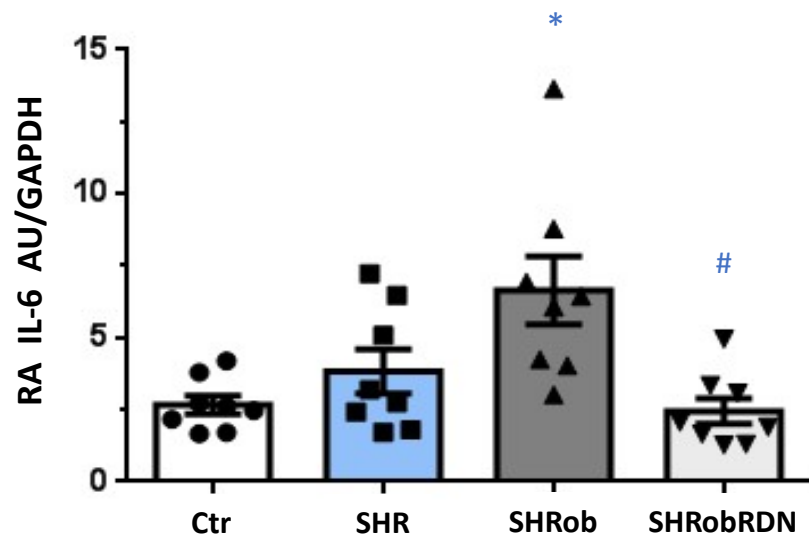

E Right atrial expression of TNF $\alpha$

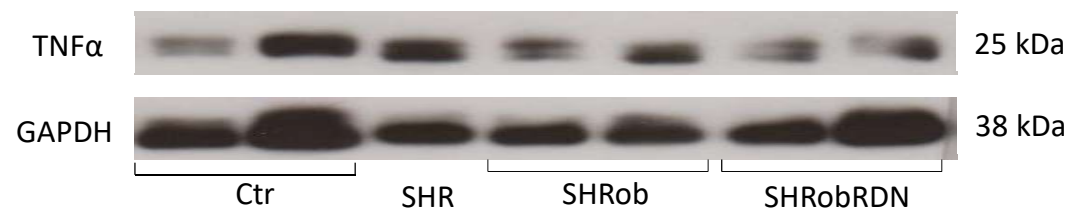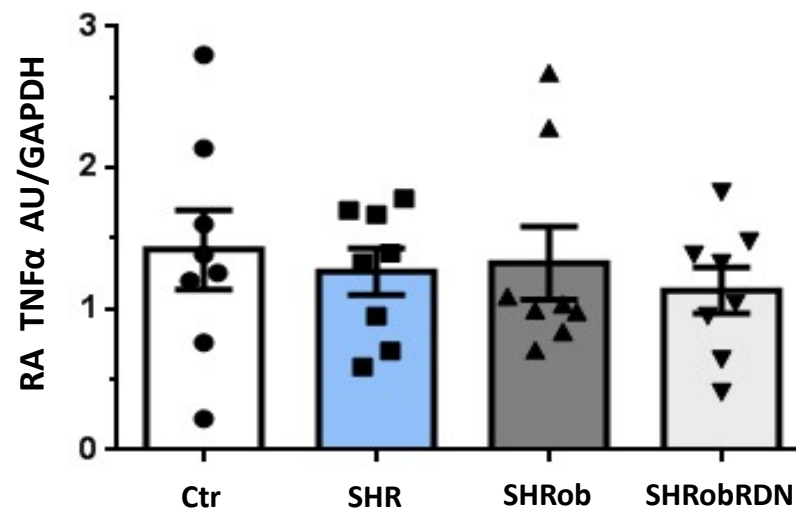

Supplementary  
Figure 4

F Right atrial F4/80 + macrophages

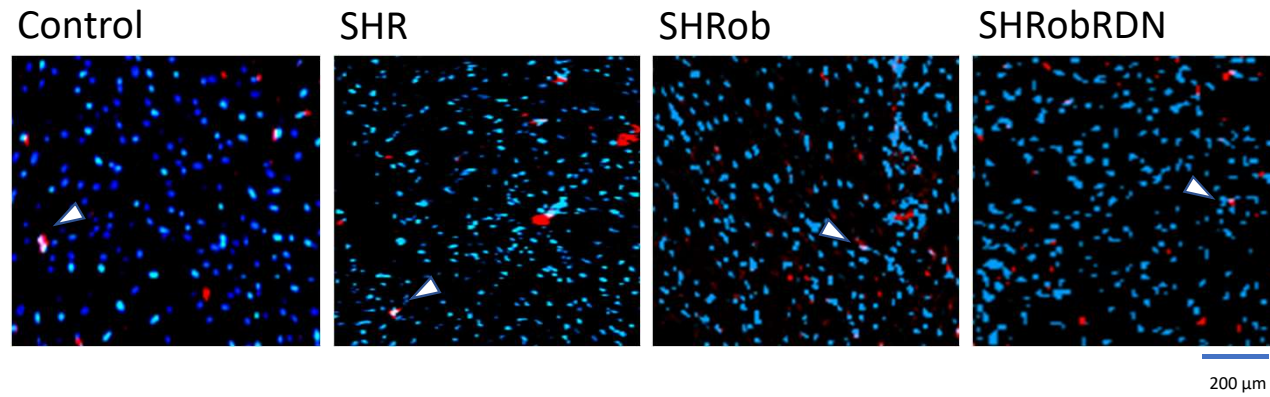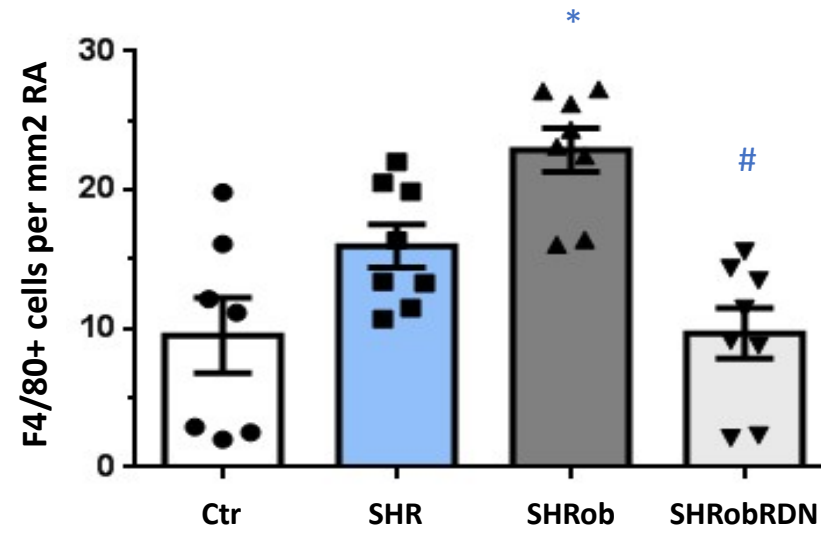

Supplementary  
Figure 4

G Right atrial Ly6G+ cells

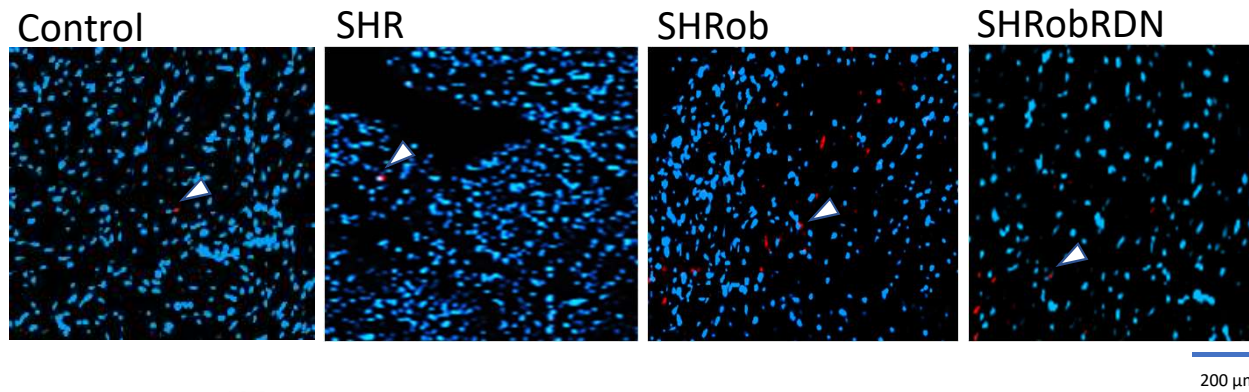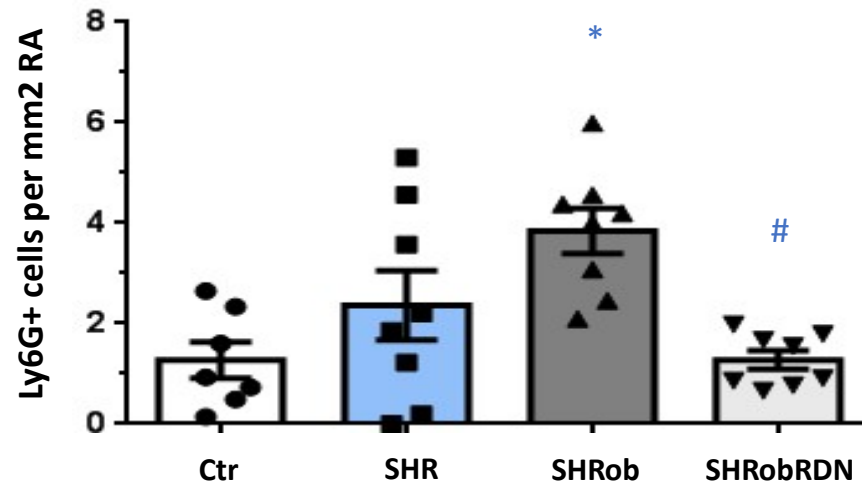

Supplement: MOESM1 [file 23268006]
